# Supplementary material for: HTLV infection in Brazil’s second-largest indigenous reserve
Source: PubMed Central journal article supplement (PMC9537150; doi:10.1038/s41598-022-21086-7), 2022-10-06
Supplement: 41598_2022_21086_MOESM1_ESM.pdf [file 41598_2022_21086_MOESM1_ESM.pdf]

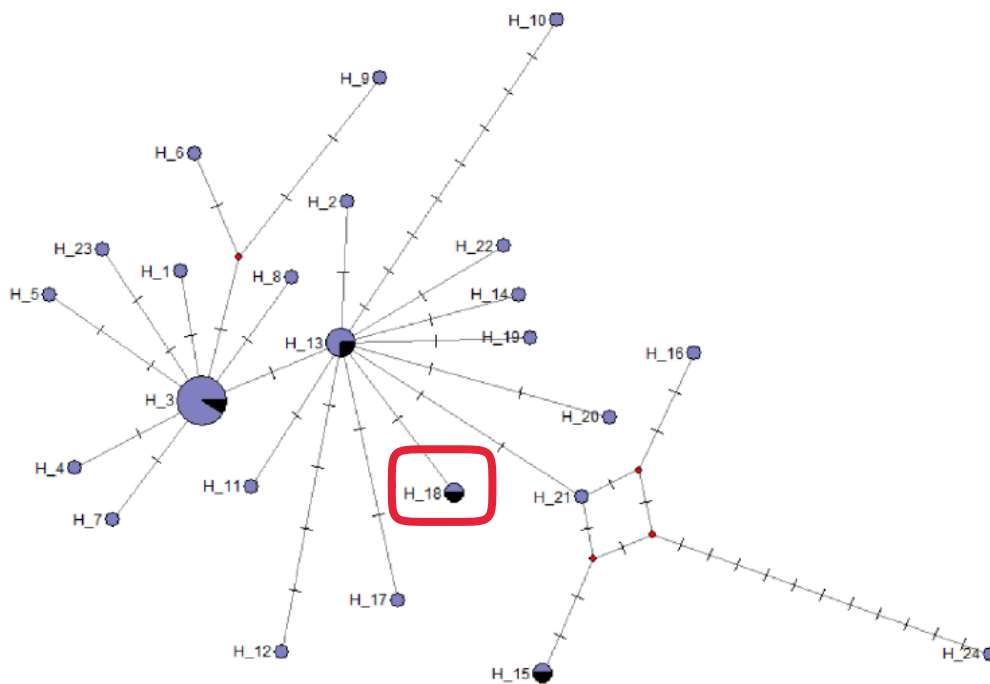

**Supplementary Figure S1. Haplotype network of HTLV-1aA from different groups.**

Haplotype network based on the total of Transcontinental (A) sequences from phylogenetic tree (39 sequences). GenBank nucleotide sequences accession number: H\_1: KY490575; H\_2: KY49058; H\_3: FJ853491, FJ853490, DQ471190, DQ471191, DQ471196, DQ471193, JF271842, JF271840, GQ443755, KM023763, DQ070892; H\_4: DQ471189; H\_5: DQ471192; H\_6: DQ471187; H\_7: DQ471188; H\_8: DQ471194; H\_9: DQ471195; H\_10: EU392159; H\_11: EU392160; H\_12: DQ471197; H\_13: JF271836, KM023762, KY510690, OK247617; H\_14: JF271841; H\_15: JF271837, JF271838; H\_16: L36905; H\_17: AY499185; H\_18: OM863789 (ID-137), OM863790 (ID-763); H\_19: GQ443757; H\_20: KY510691; H\_21: GQ443756; H\_22: OK247616; H\_23: DQ070891; H\_24: AY920503.
